# Supplementary material
Source: publisher figshare collection journal article supplement (https://frontiersin.figshare.com/ndownloader/files/26632583)
Supplement: Supplementary file 1 [file 26632583]

**Supplemental Figure Captions**

**Figure S1**. Alternative formulation for the heuristic model of technological diffusion depicted in Figure 1. Model assumptions, axis labels and coloring conventions are the same as in Figure 1, but in this version all new adopters in a time step are assigned to the same initial CT application.

**Figure S2**. Trends in anthropogenic habitat in camera trap studies derived from a generalized additive model. Fit statistics are given in Table S3.

**Figure S3**. Plots of family-level effects from multivariate regression to estimate probability of familial occurrence in camera-trapping articles as a function of year. Familial categories are provided in the caption of Table S2. Only notable (*P* ≤ 0.05) effects are shown.

**Figure S4**. Plot of Pearson residuals for test of homogeneity of proportions of 6 study themes over chronologically ordered time intervals (*X*2 = 100.92, *P* = 0.0005).

**Figure S5**. Plot of Pearson residuals for test of homogeneity of proportions of 26 topics over chronologically ordered time intervals (*X*2 = 573.22, *P* = 0.0005). Topic definitions are given in Table 1.

**Figure S6**. Plot of Pearson residuals for test of homogeneity of proportions of 5 major taxonomic groupings over chronologically ordered time intervals (*X*2 = 64.01, *P* = 0.029).

**Figure S7**. Plot of Pearson residuals for test of homogeneity of proportions of mammalian orders over chronologically ordered time intervals (*X*2 = 72.17, *P* = 0.481). Some orders were pooled (see caption of Table S2).

**Figure S8**. Plot of Pearson residuals for test of homogeneity of proportions of carnivore families over chronologically ordered time intervals (*X*2 = 95.48, *P* = 0.95). Some families were pooled (see caption of Table S2).

**Figure S9**. Plot of Pearson residuals for test of homogeneity of proportions of 7 realms across chronologically ordered time intervals (*X*2 = 130.86, *P* = 0.0005).

**Figure S10**. Plot of Pearson residuals for test of homogeneity of proportions of 14 biomes across chronologically ordered time intervals (*X*2 = 182.23, *P* = 0.02).
